# Supplementary material
Source: publisher figshare collection journal article supplement (https://aacr.figshare.com/ndownloader/files/39974542)
Supplement: Supplementary file 1 [file 39974542]

# Supplementary Figures S1

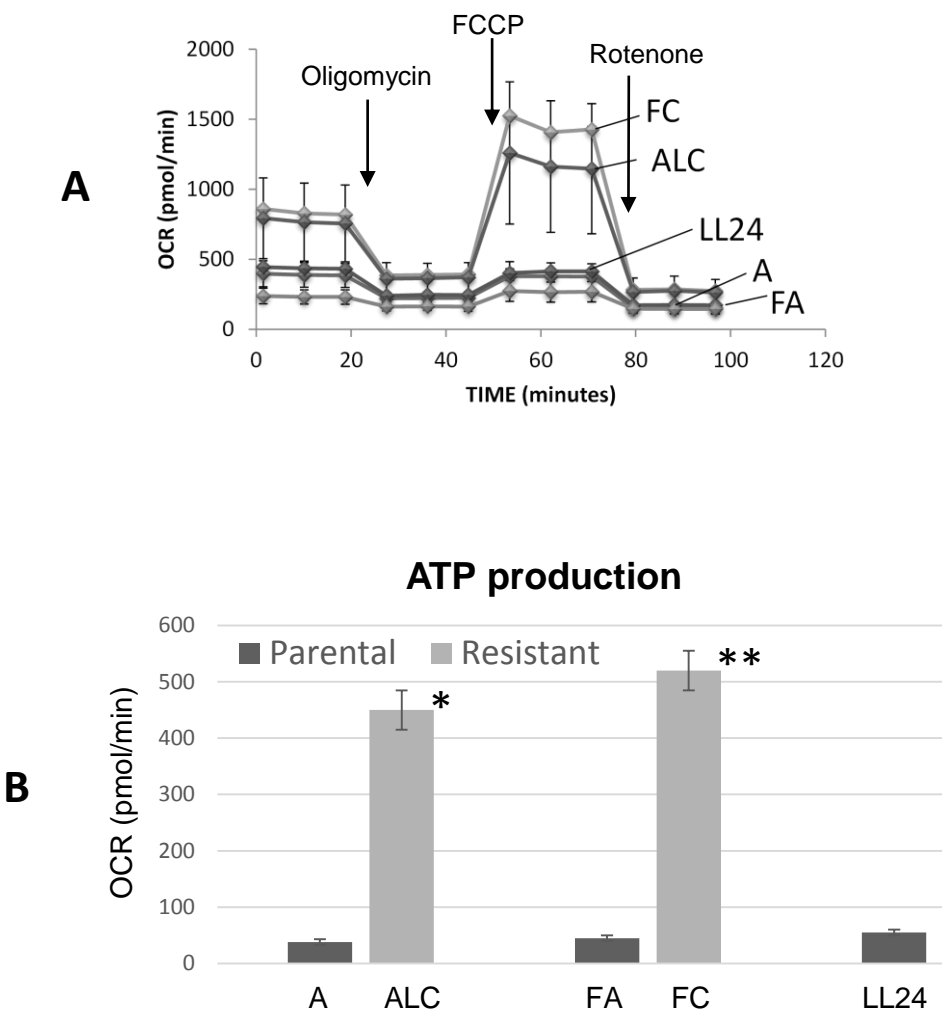

**Figure S1.** Increased OXPHOS was found in CR cells. (A)The schematic presentation of the experimental workflow using Seahorse analyzer. Note: Parental cells (A and FA). CR cells (ALC and FC). LL24 is normal lung fibroblast. (B) CR cells produced significantly higher ATP than parental counterparts (\* $p=0.005$ , \*\* $p=0.004$ ).
